# Supplementary material
Source: publisher figshare collection journal article supplement (https://acs.figshare.com/ndownloader/files/5743701)
Supplement: Supplementary file 1 [file 5743701]

 
data_pl267
 
_audit_creation_method            SHELXL-97
_chemical_name_systematic
;
 ?
;
_chemical_name_common             ?
_chemical_melting_point           ?
_chemical_formula_moiety          ?
_chemical_formula_sum
 'C0 F8 Fe2 N6 O8 P2'
_chemical_formula_weight          537.70
 
loop_
 _atom_type_symbol
 _atom_type_description
 _atom_type_scat_dispersion_real
 _atom_type_scat_dispersion_imag
 _atom_type_scat_source
 'N'  'N'   0.0061   0.0033
 'International Tables Vol C Tables 4.2.6.8 and 6.1.1.4'
 'O'  'O'   0.0106   0.0060
 'International Tables Vol C Tables 4.2.6.8 and 6.1.1.4'
 'F'  'F'   0.0171   0.0103
 'International Tables Vol C Tables 4.2.6.8 and 6.1.1.4'
 'P'  'P'   0.1023   0.0942
 'International Tables Vol C Tables 4.2.6.8 and 6.1.1.4'
 'Fe'  'Fe'   0.3463   0.8444
 'International Tables Vol C Tables 4.2.6.8 and 6.1.1.4'
 'C'  'C'   0.0033   0.0016
 'International Tables Vol C Tables 4.2.6.8 and 6.1.1.4'
 
_symmetry_cell_setting            ?
_symmetry_space_group_name_H-M    ?
 
loop_
 _symmetry_equiv_pos_as_xyz
 'x, y, z'
 '-x, -y, z+1/2'
 '-x+1/2, y+1/2, z+1/2'
 'x+1/2, -y+1/2, z'
 
_cell_length_a                    22.810(3)
_cell_length_b                    7.5762(12)
_cell_length_c                    8.8993(14)
_cell_angle_alpha                 90.00
_cell_angle_beta                  90.00
_cell_angle_gamma                 90.00
_cell_volume                      1537.9(4)
_cell_formula_units_Z             4
_cell_measurement_temperature     293(2)
_cell_measurement_reflns_used     4908
_cell_measurement_theta_min       2.45
_cell_measurement_theta_max       27.95
 
_exptl_crystal_description        block
_exptl_crystal_colour             green
_exptl_crystal_size_max           0.25
_exptl_crystal_size_mid           0.25
_exptl_crystal_size_min           0.05
_exptl_crystal_density_meas       ?
_exptl_crystal_density_diffrn     2.322
_exptl_crystal_density_method     'not measured'
_exptl_crystal_F_000              1040
_exptl_absorpt_coefficient_mu     2.234
_exptl_absorpt_correction_type    ?
_exptl_absorpt_correction_T_min   ?
_exptl_absorpt_correction_T_max   ?
_exptl_absorpt_process_details    ?
 
_exptl_special_details
;
 ?
;
 
_diffrn_ambient_temperature       173(1)
_diffrn_radiation_wavelength      0.71069
_diffrn_radiation_type            MoK\a
_diffrn_radiation_source          'fine-focus sealed tube'
_diffrn_radiation_monochromator   graphite
_diffrn_measurement_device_type   ?
_diffrn_measurement_method        ?
_diffrn_detector_area_resol_mean  ?
_diffrn_standards_number          ?
_diffrn_standards_interval_count  ?
_diffrn_standards_interval_time   ?
_diffrn_standards_decay_%         ?
_diffrn_reflns_number             1853
_diffrn_reflns_av_R_equivalents   0.0000
_diffrn_reflns_av_sigmaI/netI     0.0426
_diffrn_reflns_limit_h_min        0
_diffrn_reflns_limit_h_max        28
_diffrn_reflns_limit_k_min        0
_diffrn_reflns_limit_k_max        9
_diffrn_reflns_limit_l_min        0
_diffrn_reflns_limit_l_max        10
_diffrn_reflns_theta_min          2.83
_diffrn_reflns_theta_max          27.94
_reflns_number_total              1853
_reflns_number_gt                 1652
_reflns_threshold_expression      >2sigma(I)
 
_computing_data_collection        ?
_computing_cell_refinement        ?
_computing_data_reduction         ?
_computing_structure_solution     ?
_computing_structure_refinement   'SHELXL-97 (Sheldrick, 1997)'
_computing_molecular_graphics     ?
_computing_publication_material   ?
 
_refine_special_details
;
 Refinement of F^2^ against ALL reflections.  The weighted R-factor wR and
 goodness of fit S are based on F^2^, conventional R-factors R are based
 on F, with F set to zero for negative F^2^. The threshold expression of
 F^2^ > 2sigma(F^2^) is used only for calculating R-factors(gt) etc. and is
 not relevant to the choice of reflections for refinement.  R-factors based
 on F^2^ are statistically about twice as large as those based on F, and R-
 factors based on ALL data will be even larger.
;
 
_refine_ls_structure_factor_coef  Fsqd
_refine_ls_matrix_type            full
_refine_ls_weighting_scheme       calc
_refine_ls_weighting_details
 'calc w=1/[\s^2^(Fo^2^)+(0.0371P)^2^+4.6106P] where P=(Fo^2^+2Fc^2^)/3'
_atom_sites_solution_primary      direct
_atom_sites_solution_secondary    difmap
_atom_sites_solution_hydrogens    geom
_refine_ls_hydrogen_treatment     mixed
_refine_ls_extinction_method      none
_refine_ls_extinction_coef        ?
_refine_ls_abs_structure_details
 'Flack H D (1983), Acta Cryst. A39, 876-881'
_refine_ls_abs_structure_Flack    0.07(5)
_refine_ls_number_reflns          1853
_refine_ls_number_parameters      290
_refine_ls_number_restraints      1
_refine_ls_R_factor_all           0.0558
_refine_ls_R_factor_gt            0.0487
_refine_ls_wR_factor_ref          0.1144
_refine_ls_wR_factor_gt           0.1090
_refine_ls_goodness_of_fit_ref    1.127
_refine_ls_restrained_S_all       1.127
_refine_ls_shift/su_max           0.000
_refine_ls_shift/su_mean          0.000
 
loop_
 _atom_site_label
 _atom_site_type_symbol
 _atom_site_fract_x
 _atom_site_fract_y
 _atom_site_fract_z
 _atom_site_U_iso_or_equiv
 _atom_site_adp_type
 _atom_site_occupancy
 _atom_site_symmetry_multiplicity
 _atom_site_calc_flag
 _atom_site_refinement_flags
 _atom_site_disorder_assembly
 _atom_site_disorder_group
Fe2 Fe 0.75102(5) 0.21131(13) 0.64381(14) 0.0284(2) Uani 1 1 d . . .
Fe1 Fe 0.53175(4) 0.21279(12) 0.75067(16) 0.0315(3) Uani 1 1 d . . .
P2 P 0.61386(9) 0.2492(3) 0.2669(4) 0.0404(5) Uani 1 1 d . . .
P1 P 0.64279(7) -0.0311(2) 0.7513(4) 0.0337(4) Uani 1 1 d . . .
F2 F 0.6570(3) -0.1513(10) 0.8850(10) 0.0574(19) Uani 1 1 d . . .
O8 O 0.6828(2) 0.1201(7) 0.7563(10) 0.0397(12) Uani 1 1 d . . .
F1 F 0.6594(3) -0.1565(10) 0.6250(12) 0.062(2) Uani 1 1 d . . .
N4 N 0.7685(4) 0.0710(13) 0.5040(9) 0.044(2) Uani 1 1 d . . .
N1 N 0.4846(4) 0.2238(12) 0.6034(10) 0.043(2) Uani 1 1 d . . .
O6 O 0.8616(3) 0.2534(8) 0.7827(11) 0.0529(19) Uani 1 1 d . . .
O7 O 0.5797(2) -0.0032(6) 0.7483(11) 0.0419(12) Uani 1 1 d . . .
N6 N 0.8131(3) 0.2310(7) 0.7522(11) 0.0309(12) Uani 1 1 d . . .
N3 N 0.5753(3) 0.3921(8) 0.7476(12) 0.0392(14) Uani 1 1 d . . .
O2 O 0.4607(4) 0.2811(18) 1.0055(12) 0.079(3) Uani 1 1 d . . .
N5 N 0.7368(3) 0.4208(10) 0.5831(9) 0.0405(16) Uani 1 1 d . . .
N2 N 0.4907(4) 0.2259(15) 0.9127(12) 0.053(2) Uani 1 1 d . . .
O5 O 0.7399(4) 0.5571(10) 0.5250(9) 0.054(2) Uani 1 1 d . . .
O1 O 0.4526(4) 0.2829(16) 0.5179(10) 0.071(3) Uani 1 1 d . . .
O4 O 0.7908(4) -0.0018(11) 0.4056(9) 0.071(2) Uani 1 1 d . . .
O3 O 0.5957(3) 0.5311(8) 0.7462(15) 0.070(2) Uani 1 1 d . . .
F6 F 0.6047(13) 0.385(4) 0.148(3) 0.094(11) Uani 0.516(16) 1 d P A 1
F5 F 0.636(2) 0.382(4) 0.153(4) 0.17(2) Uani 0.484(16) 1 d P A 2
F10 F 0.6306(12) 0.102(2) 0.147(3) 0.093(8) Uani 0.516(16) 1 d P A 1
F9 F 0.5902(14) 0.130(3) 0.141(3) 0.106(11) Uani 0.484(16) 1 d P A 2
F14 F 0.6828(6) 0.309(3) 0.269(2) 0.091(6) Uani 0.516(16) 1 d P A 1
F13 F 0.6700(6) 0.143(2) 0.274(3) 0.088(7) Uani 0.484(16) 1 d P A 2
F8 F 0.5532(6) 0.179(3) 0.277(3) 0.096(7) Uani 0.516(16) 1 d P A 1
F7 F 0.5517(7) 0.354(2) 0.270(4) 0.106(8) Uani 0.484(16) 1 d P A 2
F12 F 0.6342(11) 0.112(3) 0.396(2) 0.082(6) Uani 0.516(16) 1 d P A 1
F11 F 0.5881(14) 0.120(3) 0.391(3) 0.104(9) Uani 0.484(16) 1 d P A 2
F3 F 0.6287(15) 0.367(4) 0.398(3) 0.116(15) Uani 0.484(16) 1 d P A 1
F4 F 0.6075(15) 0.395(3) 0.393(2) 0.100(12) Uani 0.516(16) 1 d P A 2
 
loop_
 _atom_site_aniso_label
 _atom_site_aniso_U_11
 _atom_site_aniso_U_22
 _atom_site_aniso_U_33
 _atom_site_aniso_U_23
 _atom_site_aniso_U_13
 _atom_site_aniso_U_12
Fe2 0.0297(5) 0.0308(5) 0.0246(5) -0.0014(6) 0.0014(4) -0.0010(4)
Fe1 0.0268(5) 0.0306(5) 0.0370(6) 0.0012(7) -0.0003(6) -0.0014(4)
P2 0.0459(11) 0.0310(8) 0.0442(13) 0.0004(12) -0.0024(12) -0.0049(8)
P1 0.0256(8) 0.0274(8) 0.0480(11) 0.0004(12) -0.0009(12) 0.0008(6)
F2 0.052(4) 0.048(4) 0.072(5) 0.027(4) -0.021(3) -0.006(3)
O8 0.031(2) 0.036(3) 0.052(3) -0.005(4) 0.005(3) -0.008(2)
F1 0.050(3) 0.044(4) 0.091(6) -0.028(4) 0.008(4) -0.002(3)
N4 0.056(6) 0.048(4) 0.029(4) -0.003(3) 0.006(3) -0.008(4)
N1 0.038(5) 0.044(5) 0.045(5) -0.005(4) -0.005(3) -0.001(4)
O6 0.033(3) 0.046(3) 0.080(6) -0.004(4) -0.009(3) -0.002(2)
O7 0.026(2) 0.033(2) 0.067(4) -0.004(4) -0.005(4) -0.0046(19)
N6 0.037(3) 0.023(2) 0.033(3) 0.006(4) 0.004(4) 0.001(2)
N3 0.031(3) 0.038(3) 0.049(4) -0.002(5) 0.001(4) -0.004(2)
O2 0.057(5) 0.123(9) 0.058(6) 0.001(6) 0.024(4) 0.010(6)
N5 0.046(4) 0.046(4) 0.030(3) 0.000(3) 0.009(3) 0.000(3)
N2 0.037(5) 0.066(7) 0.055(6) 0.011(5) 0.008(4) 0.003(5)
O5 0.076(6) 0.041(4) 0.046(4) 0.020(3) 0.004(4) 0.015(4)
O1 0.070(6) 0.094(7) 0.048(5) -0.014(5) -0.028(4) 0.025(5)
O4 0.093(6) 0.074(5) 0.047(4) -0.033(4) 0.021(4) -0.007(4)
O3 0.079(5) 0.043(3) 0.089(5) 0.004(5) -0.026(6) -0.029(3)
F6 0.16(3) 0.056(12) 0.070(14) 0.043(10) -0.032(17) 0.014(14)
F5 0.31(6) 0.042(14) 0.14(3) -0.008(15) 0.14(4) -0.07(3)
F10 0.16(2) 0.043(8) 0.073(13) -0.008(9) 0.036(16) 0.019(11)
F9 0.18(3) 0.048(11) 0.095(17) -0.034(11) -0.07(2) 0.005(13)
F14 0.066(8) 0.131(16) 0.076(11) 0.026(14) -0.021(10) -0.041(9)
F13 0.044(7) 0.087(12) 0.133(19) -0.024(14) -0.010(11) 0.031(7)
F8 0.057(8) 0.117(14) 0.113(17) 0.018(15) 0.005(11) -0.041(8)
F7 0.064(9) 0.077(11) 0.18(2) 0.004(17) -0.008(16) 0.040(8)
F12 0.116(16) 0.069(11) 0.061(10) 0.018(8) -0.014(11) -0.011(11)
F11 0.14(2) 0.070(12) 0.101(17) 0.035(11) 0.053(18) 0.007(14)
F3 0.15(2) 0.095(19) 0.10(2) -0.059(14) -0.09(2) 0.051(16)
F4 0.20(3) 0.047(9) 0.055(13) -0.010(8) 0.060(17) 0.015(15)
 
_geom_special_details
;
 All esds (except the esd in the dihedral angle between two l.s. planes)
 are estimated using the full covariance matrix.  The cell esds are taken
 into account individually in the estimation of esds in distances, angles
 and torsion angles; correlations between esds in cell parameters are only
 used when they are defined by crystal symmetry.  An approximate (isotropic)
 treatment of cell esds is used for estimating esds involving l.s. planes.
;
 
loop_
 _geom_bond_atom_site_label_1
 _geom_bond_atom_site_label_2
 _geom_bond_distance
 _geom_bond_site_symmetry_2
 _geom_bond_publ_flag
Fe2 N4 1.684(9) . ?
Fe2 N5 1.708(8) . ?
Fe2 N6 1.721(7) . ?
Fe2 O8 1.976(6) . ?
Fe1 N3 1.683(6) . ?
Fe1 N1 1.697(9) . ?
Fe1 N2 1.723(10) . ?
Fe1 O7 1.969(5) . ?
P2 F8 1.486(12) . ?
P2 F6 1.488(17) . ?
P2 F3 1.51(2) . ?
P2 F5 1.51(3) . ?
P2 F13 1.515(12) . ?
P2 F9 1.54(2) . ?
P2 F4 1.58(2) . ?
P2 F11 1.587(19) . ?
P2 F10 1.589(19) . ?
P2 F12 1.614(18) . ?
P2 F7 1.626(12) . ?
P2 F14 1.637(13) . ?
P1 O7 1.455(5) . ?
P1 O8 1.465(5) . ?
P1 F1 1.519(8) . ?
P1 F2 1.533(7) . ?
N4 O4 1.153(11) . ?
N1 O1 1.146(12) . ?
O6 N6 1.151(8) . ?
N3 O3 1.151(8) . ?
O2 N2 1.151(14) . ?
N5 O5 1.157(10) . ?
F14 F3 1.75(4) . ?
F7 F4 1.71(4) . ?
 
loop_
 _geom_angle_atom_site_label_1
 _geom_angle_atom_site_label_2
 _geom_angle_atom_site_label_3
 _geom_angle
 _geom_angle_site_symmetry_1
 _geom_angle_site_symmetry_3
 _geom_angle_publ_flag
N4 Fe2 N5 113.4(4) . . ?
N4 Fe2 N6 105.9(4) . . ?
N5 Fe2 N6 104.7(3) . . ?
N4 Fe2 O8 109.9(4) . . ?
N5 Fe2 O8 109.6(3) . . ?
N6 Fe2 O8 113.3(4) . . ?
N3 Fe1 N1 108.7(5) . . ?
N3 Fe1 N2 106.7(5) . . ?
N1 Fe1 N2 107.4(4) . . ?
N3 Fe1 O7 110.1(3) . . ?
N1 Fe1 O7 112.6(4) . . ?
N2 Fe1 O7 111.1(5) . . ?
F8 P2 F6 99.3(14) . . ?
F8 P2 F3 111.9(18) . . ?
F6 P2 F3 99.7(18) . . ?
F8 P2 F5 126(2) . . ?
F6 P2 F5 28(2) . . ?
F3 P2 F5 93(2) . . ?
F8 P2 F13 126.5(10) . . ?
F6 P2 F13 121.1(16) . . ?
F3 P2 F13 95.4(14) . . ?
F5 P2 F13 96(2) . . ?
F8 P2 F9 60.5(16) . . ?
F6 P2 F9 80.8(16) . . ?
F3 P2 F9 172.2(19) . . ?
F5 P2 F9 91(2) . . ?
F13 P2 F9 90.9(13) . . ?
F8 P2 F4 96.9(15) . . ?
F6 P2 F4 90.4(15) . . ?
F3 P2 F4 19.5(17) . . ?
F5 P2 F4 92.3(15) . . ?
F13 P2 F4 114.8(15) . . ?
F9 P2 F4 153.6(16) . . ?
F8 P2 F11 52.5(13) . . ?
F6 P2 F11 150.1(16) . . ?
F3 P2 F11 85.0(19) . . ?
F5 P2 F11 176.4(18) . . ?
F13 P2 F11 87.4(13) . . ?
F9 P2 F11 90.7(14) . . ?
F4 P2 F11 84.6(13) . . ?
F8 P2 F10 90.7(12) . . ?
F6 P2 F10 92.6(16) . . ?
F3 P2 F10 151.8(15) . . ?
F5 P2 F10 86.6(16) . . ?
F13 P2 F10 56.7(13) . . ?
F9 P2 F10 35.3(12) . . ?
F4 P2 F10 171.2(16) . . ?
F11 P2 F10 96.8(12) . . ?
F8 P2 F12 89.6(11) . . ?
F6 P2 F12 171.1(14) . . ?
F3 P2 F12 76.6(14) . . ?
F5 P2 F12 144(2) . . ?
F13 P2 F12 52.1(12) . . ?
F9 P2 F12 103.9(12) . . ?
F4 P2 F12 88.3(13) . . ?
F11 P2 F12 38.4(11) . . ?
F10 P2 F12 87.4(10) . . ?
F8 P2 F7 50.3(9) . . ?
F6 P2 F7 63.5(16) . . ?
F3 P2 F7 83.7(14) . . ?
F5 P2 F7 89(2) . . ?
F13 P2 F7 175.5(14) . . ?
F9 P2 F7 89.7(15) . . ?
F4 P2 F7 64.2(15) . . ?
F11 P2 F7 88.1(14) . . ?
F10 P2 F7 124.5(15) . . ?
F12 P2 F7 123.4(15) . . ?
F8 P2 F14 173.5(11) . . ?
F6 P2 F14 87.1(12) . . ?
F3 P2 F14 67.3(16) . . ?
F5 P2 F14 60(2) . . ?
F13 P2 F14 48.2(9) . . ?
F9 P2 F14 120.4(16) . . ?
F4 P2 F14 83.6(14) . . ?
F11 P2 F14 121.3(14) . . ?
F10 P2 F14 88.3(12) . . ?
F12 P2 F14 84.0(11) . . ?
F7 P2 F14 134.7(10) . . ?
O7 P1 O8 120.2(3) . . ?
O7 P1 F1 108.9(4) . . ?
O8 P1 F1 110.9(4) . . ?
O7 P1 F2 108.0(5) . . ?
O8 P1 F2 108.0(4) . . ?
F1 P1 F2 98.6(3) . . ?
P1 O8 Fe2 138.4(5) . . ?
O4 N4 Fe2 165.2(9) . . ?
O1 N1 Fe1 159.4(9) . . ?
P1 O7 Fe1 132.1(3) . . ?
O6 N6 Fe2 159.4(9) . . ?
O3 N3 Fe1 167.6(7) . . ?
O5 N5 Fe2 163.6(7) . . ?
O2 N2 Fe1 160.9(11) . . ?
P2 F14 F3 52.9(10) . . ?
P2 F7 F4 56.7(10) . . ?
P2 F3 F14 59.8(12) . . ?
P2 F4 F7 59.1(11) . . ?
 
_diffrn_measured_fraction_theta_max    0.944
_diffrn_reflns_theta_full              27.94
_diffrn_measured_fraction_theta_full   0.944
_refine_diff_density_max    0.983
_refine_diff_density_min   -0.531
_refine_diff_density_rms    0.107
